# Supplementary material for: The Role of Pigments and Cryptochrome 1 in the Adaptation of Solanum lycopersicum Photosynthetic Apparatus to High-Intensity Blue Light
Source: MDPI journal article supplement (doi:10.3390/antiox13050605), 2024-05-15
Supplement: s1 [file s1]

**Table S1.** Primers for qRT-PCR analysis

|    | NCBI RefSeq      | Gene            | Gene description                                              | Forward                   | Reverse                |
|----|------------------|-----------------|---------------------------------------------------------------|---------------------------|------------------------|
| 1  | NM_00124747191.2 | <i>HY5</i>      | Transcription factor HY5                                      | AAGAGAGGGAAGAAGCCCAGC     | CTCTCCCTTGCTTGTGTGC    |
| 2  | AH009615.2       | <i>POR1</i>     | Protochlorophyllide oxidoreductase (SIPOR)                    | CTTCATTCAAAATCAAGAGCGGAAG | TTCTTTCTGTACAGGGGTACTC |
| 3  | NM_001320256.1   | <i>ELIP</i>     | Early light inducible protein                                 | CCTTCATAGGACTTCGCGTGTTA   | CTTGGTTTTGGCTTAGCAGGT  |
| 4  | X60275           | <i>CAB1</i>     | LhbC1 gene for LHCII type III                                 | TCAGTGACGGTGGACTTGAC      | ACCGGGGTATAAGTCGTTGC   |
| 5  | NM_001247883.2   | <i>PSY1</i>     | Phytoene synthase 1                                           | CGGGGAATTTGGGCTTGTG       | CCACCTATCTAAGGCTGCCG   |
| 6  | XM_004249510.4   | <i>PAL1</i>     | Phenylalanine ammonia-lyase 1                                 | GAAGCGTTCATGTTGCTGG       | TCAGTGAACTCGGGCTTCC    |
| 7  | NM_001247104.2   | <i>CHS</i>      | Chalcone synthase                                             | CCGTGGACCCAGTGAATCTC      | AGAGTTTGGGCTGCTGAGAC   |
| 8  | NM_001374394.1   | <i>ANS</i>      | Anthocyanidin synthase                                        | TCTCAATTCCACCTCGCAC       | ACTTTGCGCTCAGCAAGAAC   |
| 9  | L14403.1         | <i>rbcL</i>     | Ribulose-1,5-bisphosphate carboxylase/oxygenase large subunit | CTTTCCAAGGTCCGCCTCAT      | AAGTCCACCGGAAGACATT    |
| 11 | AM087200.3       | <i>psbA</i>     | Photosystem II protein D1                                     | AATAGGGAGCCGCCGAATAC      | AGCTGCTACCGCAGTTTCT    |
| 12 | AM087200.3       | <i>psbD</i>     | Photosystem II protein D2                                     | TATGATGGGAGTTGCCGGTG      | TCTTCGGCTTGAGTTGGGT    |
| 13 | AM087200.3       | <i>psbB</i>     | Photosystem II CP47 chlorophyll-binding protein               | TCTTGGCAAAGGCCTCAAGT      | CTGCCTAGCGGAACGGTTA    |
| 14 | AM087200.3       | <i>psbC</i>     | Photosystem II CP43 chlorophyll-binding protein               | GCACTTCTGGGACCTGAGAC      | TCTTACATCTCCCCCTCCCG   |
| 15 | Z11999.1         | <i>psbO</i>     | Photosystem II manganese-stabilizing protein                  | AACAAGGTTCAAGCAGGCTT      | ACTCCTCCGCATTGCTCC     |
| 16 | X63007.1         | <i>psbP</i>     | oxygen evolving enhancer 2 of Photosystem II                  | TACGGCTCCCCTGAAGAGTT      | GCCTCCAACAGGTTAGCAGT   |
| 17 | AY568719.1       | <i>psbQ</i>     | Photosystem II oxygen-evolving complex protein 3              | GGCAGCCCAGAGAGTTAAGG      | GCTGCATGGTCCAGATCACT   |
| 18 | A0A3Q7F8W6       | <i>Tubulin1</i> | Tubulin alpha chain                                           | ACAACCTTGCCCGTGGACAT      | TGCTCAAGAAGGGAGTGGGT   |
